# Supplementary material for: Macrophage activation and polarization modify P2X7 receptor secretome influencing the inflammatory process
Source: PubMed Central journal article supplement (PMC4776275; doi:10.1038/srep22586), 2016-03-03
Supplement: srep22586-s1.pdf [file srep22586-s1.pdf]

## Supplementary Information

### Macrophage activation and polarization modify P2X7R secretome influencing the inflammatory process.

Carlos de Torre-Minguela<sup>1</sup>, Maria Barberà-Cremades<sup>1</sup>, Ana I. Gómez<sup>1</sup>, Fátima Martín-Sánchez<sup>1</sup>,  
Pablo Pelegrín<sup>1</sup>

## Supplementary Methods

### Cells, reagents and buffers

Key reagents and their sources were as follows: *Escherichia coli* LPS serotype 055:B5, ATP, BAPTA-AM, N,N,N',N',-Tetrakis(2-pyridylmethyl) ETH (TPEN), Nigericin sodium salt and Saponin were purchased from Sigma-Aldrich (Madrid, Spain); the cell-permeant irreversible caspase-1 inhibitor IV (Ac-YVAD-AOM) and metalloprotease inhibitors (MMP9 Inhibitor I and GM6001) were from Calbiochem Merck-Millipore (Madrid, Spain); A438079 hydrochloride and Ionomycin free acid were from Tocris (Bristol, UK); and recombinant mouse IL-4 from BD Pharmingen (Madrid, Spain). The composition of the physiological buffer (Et) used in all experiments to stimulate macrophages with ATP or nigericin was (in mM): 147 NaCl, 10 HEPES, 13 D-glucose, 2 KCl, 2 CaCl<sub>2</sub>, and 1 MgCl<sub>2</sub>; pH 7.4. In some experiments to block K<sup>+</sup> efflux after P2X7R activation, a high K<sup>+</sup> extracellular solution was used, where 147 mM NaCl was reduced to 2 mM, and 145 mM of KCl was added.

### Mice

C57 BL/6 (wild type, WT) mice were purchased from Harlan. P2X7R-deficient mice in C57 BL/6 background (*P2rx7*<sup>-/-</sup>)<sup>1</sup> were purchased from Jackson NLRP3-deficient (*Nlrp3*<sup>-/-</sup>)<sup>2</sup> and Caspase-1 (*Casp1*<sup>-/-</sup>)<sup>3</sup> were in C57 BL/6 background. For all experiments, mice between 8-10 weeks of age bred under SPF conditions were used in accordance with the *Hospital Clínico Universitario Virgen Arrixaca* animal experimentation guidelines, and the Spanish national (RD 1201/2005 and Law 32/2007) and EU (86/609/EEC and 2010/63/EU) legislation.

### **Differentiation of macrophages from mouse bone marrow precursors**

Bone marrow was obtained from leg bones of mice (8–10 weeks of age) euthanized by CO<sub>2</sub> inhalation. Femurs and tibia were removed, and the bone marrow was flushed out and resuspended in DMEM (Lonza, Verviers, Belgium) supplemented with 25% of L929 medium containing macrophage-stimulating factor, 15% FCS, 100 U/ml penicillin-streptomycin, and 2 mM Glutamax, plated onto 150-mm dishes, and cultured at 37°C in the presence of 5% CO<sub>2</sub>. After 7 days, the resulting BMDMs were detached with cold PBS, replated into well plates at a confluence of  $0.42 \times 10^6$  cells/cm<sup>2</sup>, and used the following day for experiments. In the case of proteomic and antibody array experiments, BMDMs were directly stimulated in 150-mm dishes. The macrophage purity of these preparations was usually >90% and was checked routinely by flow cytometry with the murine macrophage antigen specific Ab F4/80 in a FACScalibur flow cytometer (Beckton-Dickinson Biosciences, Madrid, Spain).

### ***In vitro* macrophage stimulation**

Macrophage medium was replaced with fresh medium, and cells were primed for 4 h at 37°C with different doses of LPS (as indicated in the figure legends, M1 macrophage polarisation) or with 20 ng/ml of IL-4 (M2 macrophage polarisation) or left in medium alone to obtain resting macrophages. Cells were then rinsed three times with different buffers (Et or Et-high K<sup>+</sup>, as indicated in the figure legends, if no indication cells were stimulated in Et-buffer) and incubated in the same buffer at 37°C with 3 mM of ATP or 5 μM nigericin for different times as indicated in the text. In some experiments, cells were pretreated with various pharmacological inhibitors or BAPTA-AM 10 min before and during ATP stimulation. To terminate cell stimulation and the release of proteins, the entire volume of extracellular medium was transferred to a tube on ice, and cells were immediately lysed in lysis buffer (50 mM Tris-HCl pH8.0, 150 mM NaCl, 2% Triton X-100) supplemented with 100 μl/ml of protease inhibitor mixture (Sigma) for 30 min on ice and then centrifuged to remove particulate matter. To obtain cell-free supernatants, recovered extracellular medium was clarified by centrifugation at 16,000 xg for 30 s to remove floating cells.

### **One dimension gel electrophoresis (SDS-PAGE)**

Protein concentration of cell-free supernatants from stimulated BMDMs was estimated by Bradford assay (Bio-Rad, Hercules, USA) according to manufacturer's instructions. Fifty micrograms of cell-free supernatant protein were precipitated with 6 volume of cold acetone overnight at -20°C. Protein pellet was then resuspended in Laemmli sample buffer (Serva, Heidelberg, Germany) supplemented with  $\beta$ -mercaptoethanol (4% v/v, Sigma) and resolved in 4–12% precast Criterion polyacrylamide gels (Biorad). Gels were run at 150 V and stained overnight with Coomassie blue R-250 (0.1% w/v, Sigma). Ten gel slices were excised from each lane (for each group) and processed for LC-MS/MS. Analysis of the supernatant was performed in triplicate.

### **Liquid chromatography and tandem mass spectrometry (LC-MS/MS)**

The 10 gel slices obtained from the SDS-PAGE gel lanes were subjected to in-gel trypsin digestion. First proteins contained in selected gel bands were reduced and alkylated using dithiothreitol (DTT, 20 mM, Sigma) and iodoacetamide (55 mM, Sigma), respectively, and then digested by trypsin (proteomics grade, Sigma-Aldrich, St Louis, MO, USA) as described elsewhere <sup>4</sup>. The tryptic peptides were analyzed by capillary reversed-phase liquid chromatography coupled online with MS/MS. The column, BioBasic-18, 5  $\mu$ m particles, 300 Å pore size, 0.18 mm ID-100 mm L (Thermo Scientific, San Jose, USA), was connected to an Surveyor MS Pump Plus (Thermo Scientific, San Jose, CA) and then coupled with an ion trap mass spectrometer (LXQ, Thermo Scientific, San Jose, USA). The flow rate was set at 100  $\mu$ l/min but split to a flow rate of 2  $\mu$ l/min. Mobile phase A was 0.1% formic acid / 2% methanol in water and B was 0.1 % formic acid in methanol. The peptide samples were injected and gradient elution was done under the following conditions: 5% B in 3 min; a linear increase of 5% to 70% B in 30 min; 70% for 16 min; 5% B for 43 min. The ion trap MS was operated in a data-dependent MS/MS mode where the 15 most abundant peptide molecular ions in every MS scan were sequentially selected for collision-induced dissociation with a normalized collision energy of 34%. Dynamic exclusion was applied to minimize repeated selection of peptides previously selected for collision-induced dissociation. The capillary temperature and electrospray voltage were set to 200 °C and 3.5 kV, respectively. The resulting mass spectra were searched against

UniProtKB protein database (453320 sequences, released at June 19, 2012) and *Mus musculus* UniProtKB protein database (69036 sequences, released at May 9, 2011) with the Proteome Discoverer 1.3 software (ThermoScientific). The following search parameters were applied: default charge states of 2+, 3+, and 4+ were used; a maximum of one missed cleavage was allowed with an average peptide mass tolerance of 1.5 Da. A fragment ion search tolerance of 0.8 Da was permitted. Fixed modification on cysteine was carbamidomethylation and a variable modification was oxidation of methionine. All data were searched against a decoy database. The peptide level score cut-off for each of the runs was automatically adjusted to ensure a 1% false discovery rate throughout the experiments. A positive identification was assigned when two or more unique peptides were identified. As criterion we considered proteins that have been identified in at least two of the three independent experiments performed. The mass spectrometry proteomics data have been deposited to the ProteomeXchange Consortium<sup>5</sup> via the PRIDE partner repository with the dataset identifier PXD001981.

### **Antibody protein array**

Macrophage supernatants were assayed using the mouse-specific biotin label-based antibody array (RayBio® Biotin Label-based Mouse Antibody Array I, L-Series, RayBiotech, Norcross, USA), that detect 308 different mouse target proteins, including cytokines, chemokines, adipokines, growth factors, proteases, soluble receptors, soluble adhesion molecules and other proteins (Supplemental Table S3). Briefly, supernatants from LPS/ATP-stimulated wild-type or *P2xr7<sup>-/-</sup>* BMDMs from 3 independent experiments were pooled and concentrated in PBS pH 8.0 with Ultracel-3K Amicon Ultra (Millipore). Two hundred µg of supernatant protein were biotin-labelled according to manufacturer's instructions. Biotin-labelled supernatant were incubated with the array overnight at 4 °C followed by hybridization with HRP-conjugated streptavidin. Mouse antibody arrays were developed using Pierce ECL2 kit (Pierce, Thermo scientific) and quantified with Typhoon 9410 scanner-ImageQuantTL 7.0 software (GE Healthcare Europe, Barcelona, Spain). The analysis was performed with RayBio® Antibody Array Analysis Tool using a normalization according to positive control densities after background subtraction.

### **Protein assays by Western blots and ELISAs**

Forty milligrams of protein from clarified cells lysates and precipitated cell-free supernatants were resolved in 4–12% precast Criterion polyacrylamide gels (Biorad) and transferred to nitrocellulose membranes (Biorad) by electroblotting. Membranes were incubated overnight at 4 °C with different antibodies at 1:200 to 1:2000 dilution in blocking buffer: anti-MMR rat monoclonal (MR5D3, Acris Antibodies), anti-CD14 rat monoclonal (rmC5-3, BD Pharmingen), anti-Cystatin B rat monoclonal (Clone #227818) and anti-Cathepsin B rat monoclonal (Clone #173317) were from R&D Systems, anti Peptidyl-prolyl cis-trans isomerase A rabbit polyclonal (ab41684) were from Abcam, anti-Thioredoxin 1 rabbit polyclonal (2298) were from Cell Signaling Technology, anti-Anxa1 rabbit polyclonal (71-3400) were from Life Technologies, anti-caspase-1 p10 rabbit polyclonal (M-20, sc-514) was from Santa Cruz Biotechnology, anti-P2X7R rabbit polyclonal (C-terminus, APR-004) were from Alamone Laboratories and anti-NLRP3 mouse monoclonal (Cryo-2 clone, AG-20B-0014) were from Adipogen. HRP-conjugated secondary anti-rabbit and anti-mouse antibodies were from GE Healthcare, and HRP-conjugated secondary anti-rat antibody was from Jackson ImmunoResearch Laboratories (PA, USA). All HRP-conjugated secondary antibodies were used at 1:5000 dilution and detection using Pierce ECL2 kit and Thyphoon 9410 scanner. Densitometry analyses of membranes were performed using ImageQuant TL (GE Healthcare Europe). The amount of protein secreted was estimated from values of western blot densitometry considering the amount of protein loaded and the total amount of protein obtained from cell extracts. In the supernatant, the proportion of supernatant volume loaded was considered. The total amount of protein was estimated by adding the protein detected in the supernatant and the cellular extract. The ratio of protein secreted in the supernatant was calculated by dividing the protein detected in the supernatant by the total protein.

Amounts of IL-1 $\beta$ , TNF- $\alpha$  and CCL2 released to the supernatant were measured by ELISA (R&D Systems) following the manufacturer's instructions and read in a Synergy Mx plate reader (BioTek, Winooski, VT, USA). Concentration of target cytokine was determined using a standard curve.

## **Immunofluorescence**

Wild-type or Casp1<sup>-/-</sup>Casp11<sup>-/-</sup> BMDM cells were seeded on poly-L-lysine coated coverslips and incubated overnight before use. Macrophages were primed for 4 h with LPS (1 µg/ml), stimulated for 5 minutes with ATP (3 mM) alone or with saponin 0.01% or EGTA 10 mM and then stained with Annexin V-FITC for 10 min at room temperature according to the manufacturer's instructions (BD Biosciences). Cells were fixed with 4% formaldehyde in PBS for 15 min at RT, and then washed three times with PBS. For cell surface Anxa1 immunostaining, nonspecific binding was blocked by incubation with 1% bovine serum albumin (Sigma) and cells were incubated with a polyclonal rabbit anti-Anxa1 antibody (1:500 dilution; 713400; Life Technology) for 2h at RT. Cells were washed and then were incubated with Alexa Fluor 647 donkey anti-mouse IgG (1:200 dilution; A-31571; Life technologies) for 1 h at RT. After rinse with PBS, cells were mounted on slides with Prolong Diamond Antifade Mountant with DAPI (Life Technologies). Images were acquired with a Nikon Eclipse Ti microscope equipped with a 20xS Plan Fluor objective (numerical aperture, 0.45), a 40xS Plan Fluor objective (numerical aperture, 0.60) and a 60x Plan Apo Vc objective (numerical aperture, 1.40) and a digital Sight DS-QiMc camera (Nikon) with a Z optical spacing of 0.4 µm and 387-nm/447-nm, 472-nm/520-nm and 650-nm/668-nm filter sets (Semrock). Image stacks were deconvolved using NIH ImageJ software with Parallel Iterative Deconvolution plugin, and reconstituted maximum-intensity projections images are shown in the results.

## **Intracellular calcium assay**

BMDMs were plated in 96-well plates with black walls and clear bottoms (Costar Corning Life Sciences, Lowell, MA, USA) and incubated at 37°C for 40 min in loading buffer with 4 µM Fura-2-AM (Invitrogen Life Technologies) supplemented with 0.02% pluronic acid (Merck). At the end of this incubation, Fura-2-AM was removed and replaced with Et buffer. Fluorescence was recorded in a Synergy Mx plate reader (BioTek) for 200 s at 4 s intervals at a  $\lambda_{exc}$  couple 340/380 nm,  $\lambda_{em}$  510 nm. ATP and nigericin were automatically injected into the wells at the designated time points. Intracellular calcium level was expressed as the ratio of the emission intensities at 340 and 380 nm, and the value was normalized to the fluorescence at time 0 ( $F/F_0$ ).

### Quantitative reverse transcriptase-PCR analysis

Detailed methods used for qRT-PCR have been described previously<sup>6</sup>. Specific primers were purchased from Qiagen (QuantiTech Primer Assays). For each primer set the efficiency was >95%, and a single product were obtained on melt curve analysis. The presented relative gene expression levels were calculated using the  $2^{-\Delta\Delta Ct}$  method normalizing to *Gapdh* expression levels for each treatment and the fold increase in gene expression for LPS or IL-4 treated macrophages was relative to unprimed (resting) macrophages. The fold increase in gene expression for LPS+ATP or IL-4+ATP treated macrophages was relative to LPS or IL-4 treated macrophages respectively.

### Supplementary references

- 1 Solle, M. *et al.* Altered cytokine production in mice lacking P2X(7) receptors. *J Biol Chem* **276**, 125-132 (2001).
- 2 Martinon, F., Petrilli, V., Mayor, A., Tardivel, A. & Tschopp, J. Gout-associated uric acid crystals activate the NALP3 inflammasome. *Nature* **440**, 237-241 (2006).
- 3 Kuida, K. *et al.* Altered cytokine export and apoptosis in mice deficient in interleukin-1 beta converting enzyme. *Science* **267**, 2000-2003 (1995).
- 4 Shevchenko, A., Tomas, H., Havlis, J., Olsen, J. V. & Mann, M. In-gel digestion for mass spectrometric characterization of proteins and proteomes. *Nat Protoc* **1**, 2856-2860 (2006).
- 5 Vizcaino, J. A. *et al.* ProteomeXchange provides globally coordinated proteomics data submission and dissemination. *Nat Biotechnol* **32**, 223-226 (2014).
- 6 Lopez-Castejon, G., Baroja-Mazo, A. & Pelegrin, P. Novel macrophage polarization model: from gene expression to identification of new anti-inflammatory molecules. *Cell Mol Life Sci* **68**, 3095-3107 (2011).

## Supplementary Figures

## Supplementary Figure S1

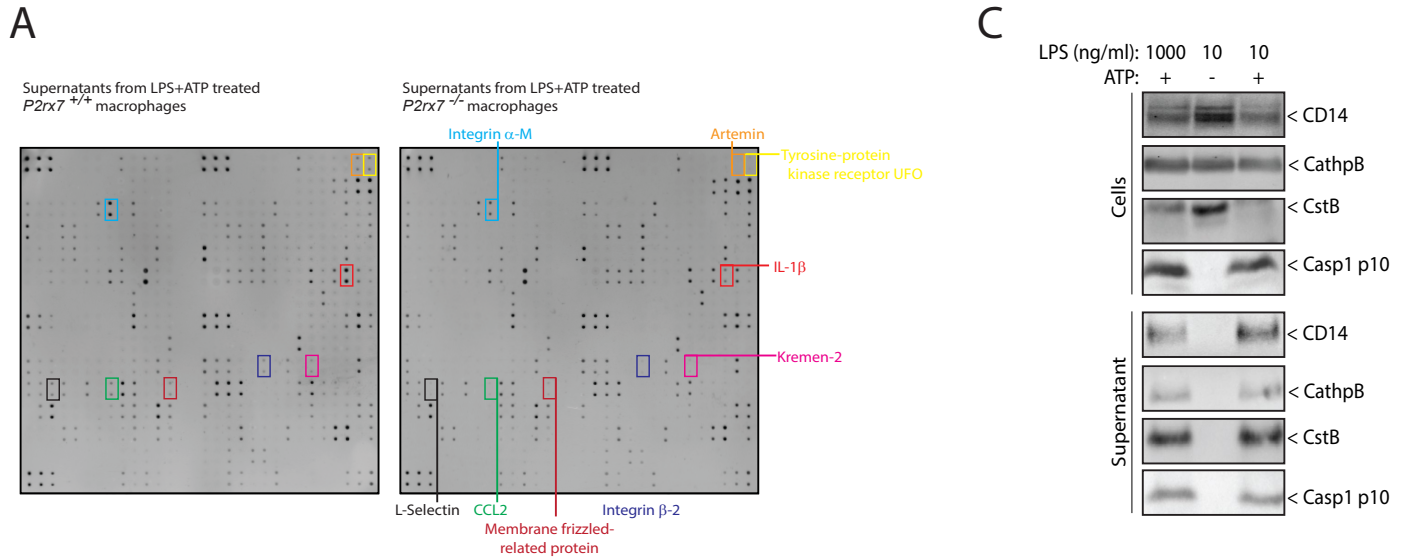

### Supplementary Figure S1. Antibody array analysis for P2X7R-dependent secreted cytokines.

- A** Antibody array analysis of cell-free supernatants from wild-type (*P2rx7<sup>+/+</sup>*) or *P2rx7<sup>-/-</sup>* mouse bone marrow-derived macrophages (BMDMs) primed for 4 h with LPS (10 ng/ml), followed by stimulation for 20 min with ATP (3 mM). The array was hybridized with a pool of supernatants from  $n = 3$  independent experiments.
- B** Analysis for IL-1 $\beta$  and LDH in cell-free supernatants from wild-type (*P2rx7<sup>+/+</sup>*) or *P2rx7<sup>-/-</sup>* mouse bone marrow-derived macrophages (BMDMs) primed for 4 h with LPS (10 ng/ml), followed by stimulation for 20 min with ATP (3 mM); data is presented as mean and s.e.m. of  $n = 3$  independent experiments; \* $p < 0.05$ ; ns,  $p > 0.05$  (Student's  $t$ -test).
- C** Western blot analysis for the release of selected secretome proteins from BMDMs primed for 4 h with different concentrations of LPS as indicated, followed by no stimulation (-) or stimulation (+) for 20 min with ATP (3 mM); Western blots are representative of two experiments.



A

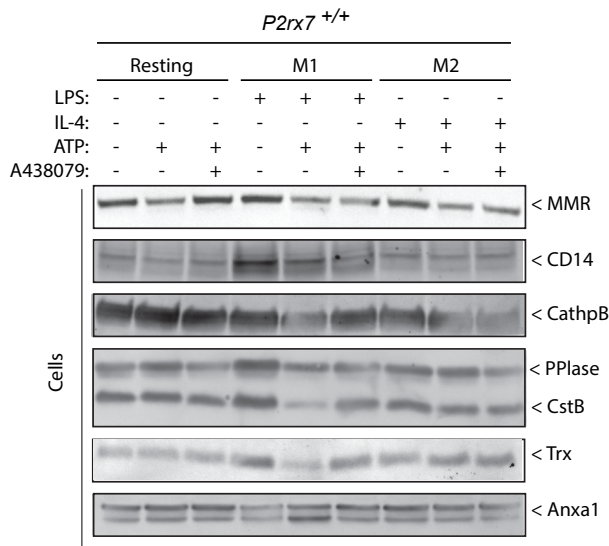

B

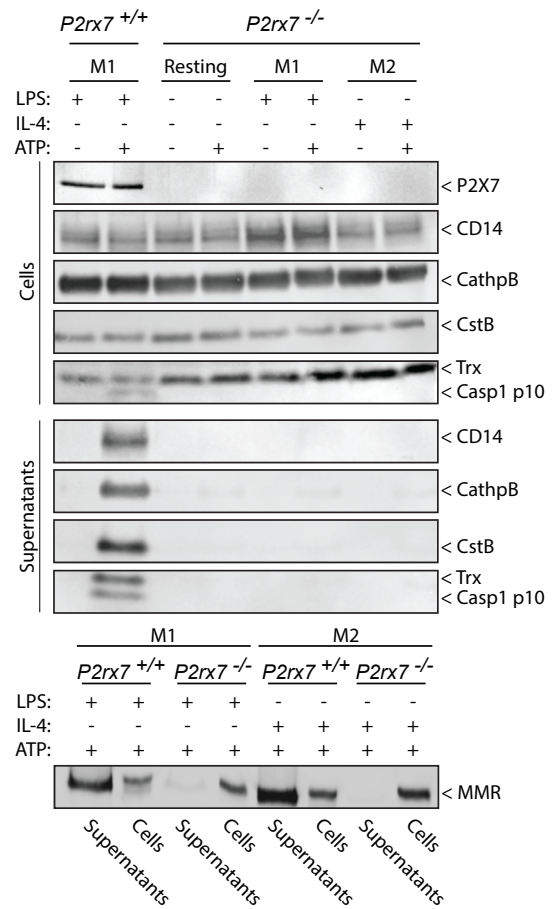

### Supplementary Figure S2. Validation of P2X7R-dependent secretome.

A,B Western blot analysis of selected P2X7R secretome proteins in cell lysates (A,B) or cell-free supernatants (B) from wild-type (*P2rx7*<sup>+/+</sup>) (A,B) or P2X7R-deficient (*P2rx7*<sup>-/-</sup>) (B) mouse bone marrow-derived macrophages (BMDMs) unprimed (resting) (-) or primed (+) for 4 h with LPS (1  $\mu$ g/ml) (M1) or with IL-4 (20 ng/ml) (M2), followed by no stimulation (-) or stimulation (+) of P2X7R for 20 min with ATP (3 mM); when indicated BMDMs were treated 10 min before and during ATP stimulation with the selective P2X7R antagonist A438079 (25  $\mu$ M). Western blot shown are representative of four independent experiments and correspond to the cell lysates of Western blots shown in Figure 3A.

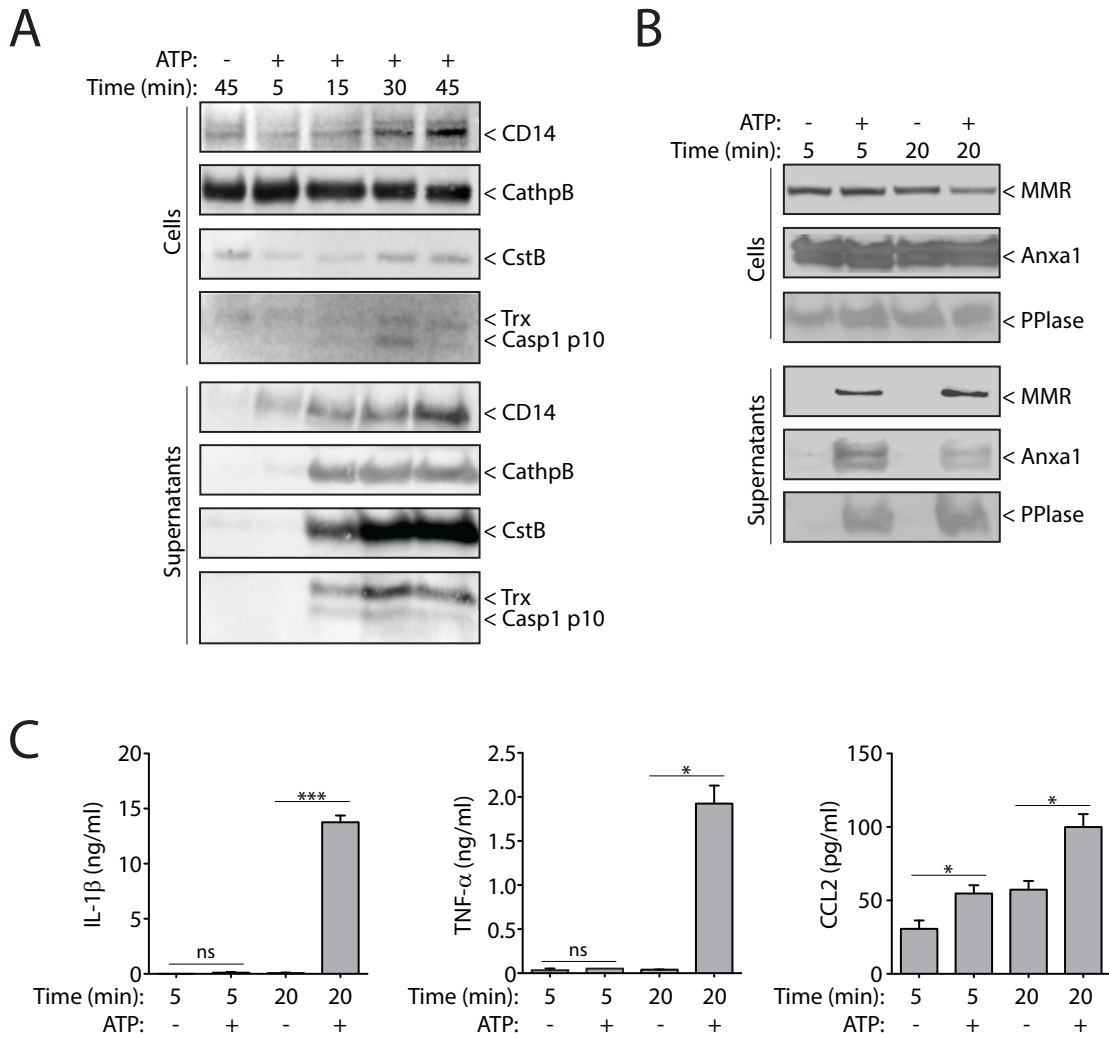

**Supplementary Figure S3. P2X7R-dependent secretome kinetics.**

A-C Western blots used for quantification (A,B) and ELISAs (C) of selected P2X7R secretome proteins shown in Figure 4A; Western blots are representative of  $n = 1-2$  independent experiments (A,B) and ELISA data is presented as mean and s.e.m. of  $n = 2$  to 3 independent experiments; \*\*\* $p < 0.001$ ; \*\* $p < 0.01$ ; \* $p < 0.05$ ; ns,  $p > 0.05$  (Student's  $t$ -test).

## Supplementary Figure S4

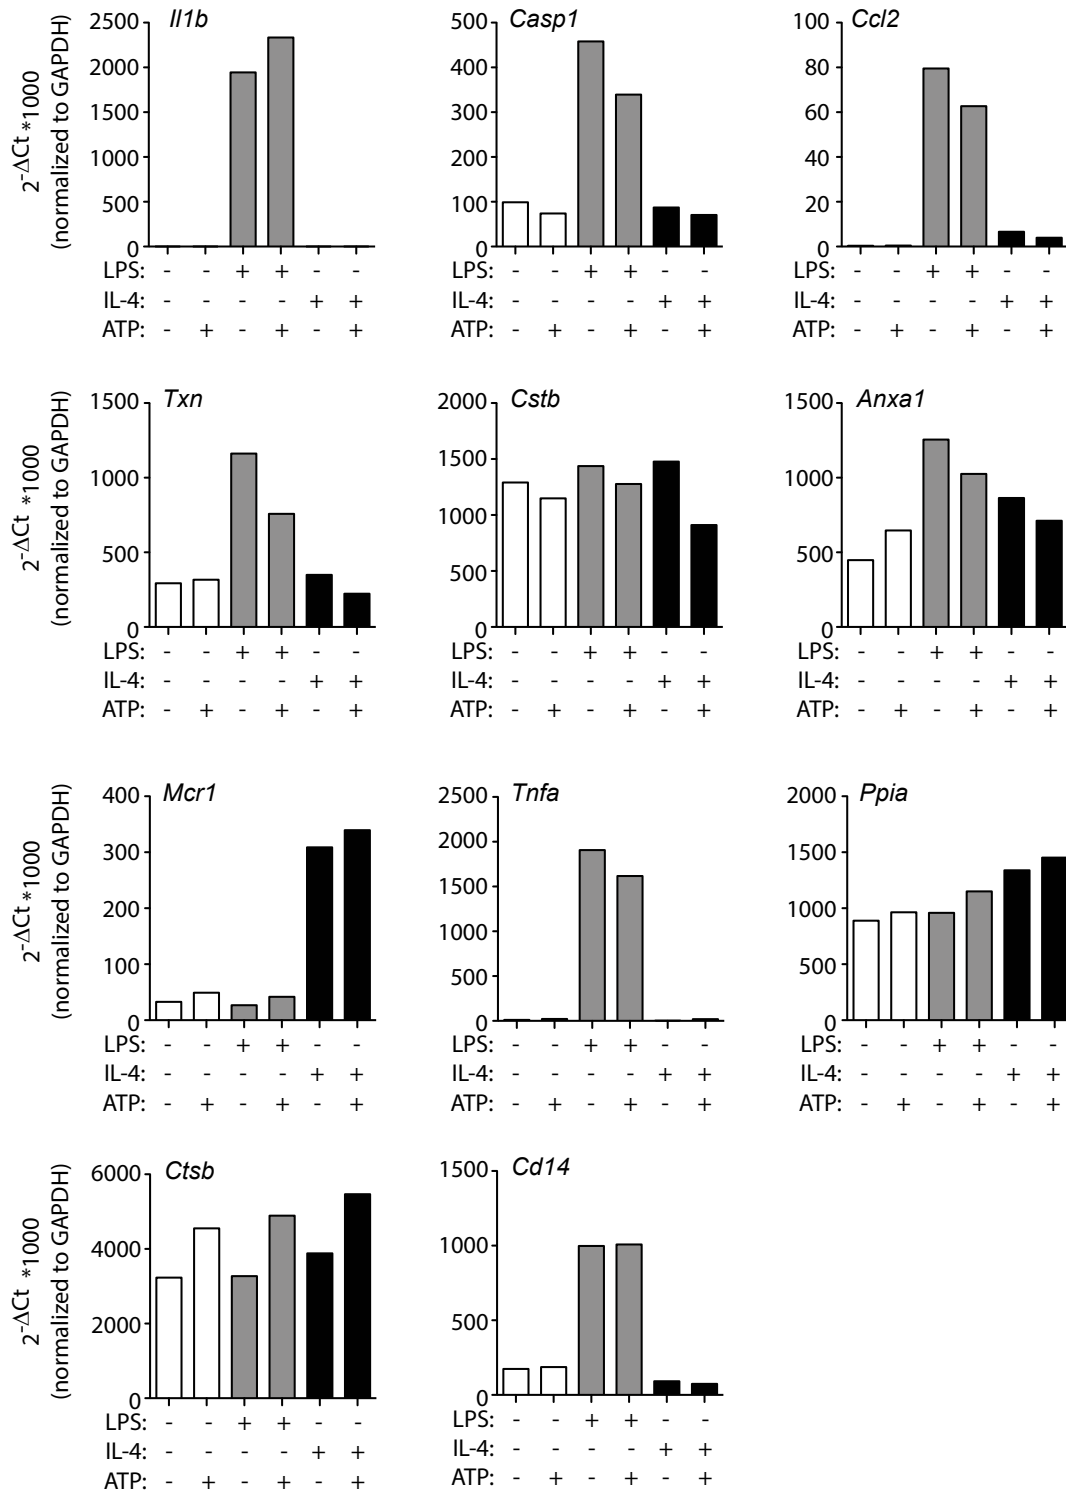

### Supplementary Figure S4. Gene expression for P2X7R-dependent secretome proteins.

Relative gene expression for all selected P2X7R secretome proteins shown in Figure 4B determined by quantitative RT-PCR from BMDMs unprimed (-) or primed (+) for 4 h with LPS (1 μg/ml) or with IL-4 (20 ng/ml), followed by no stimulation (-) or stimulation (+) for 20 min with ATP (3 mM); Data is the average of duplicate runs and representative of *n* = 2 independent experiments.

Supplementary Figure S5

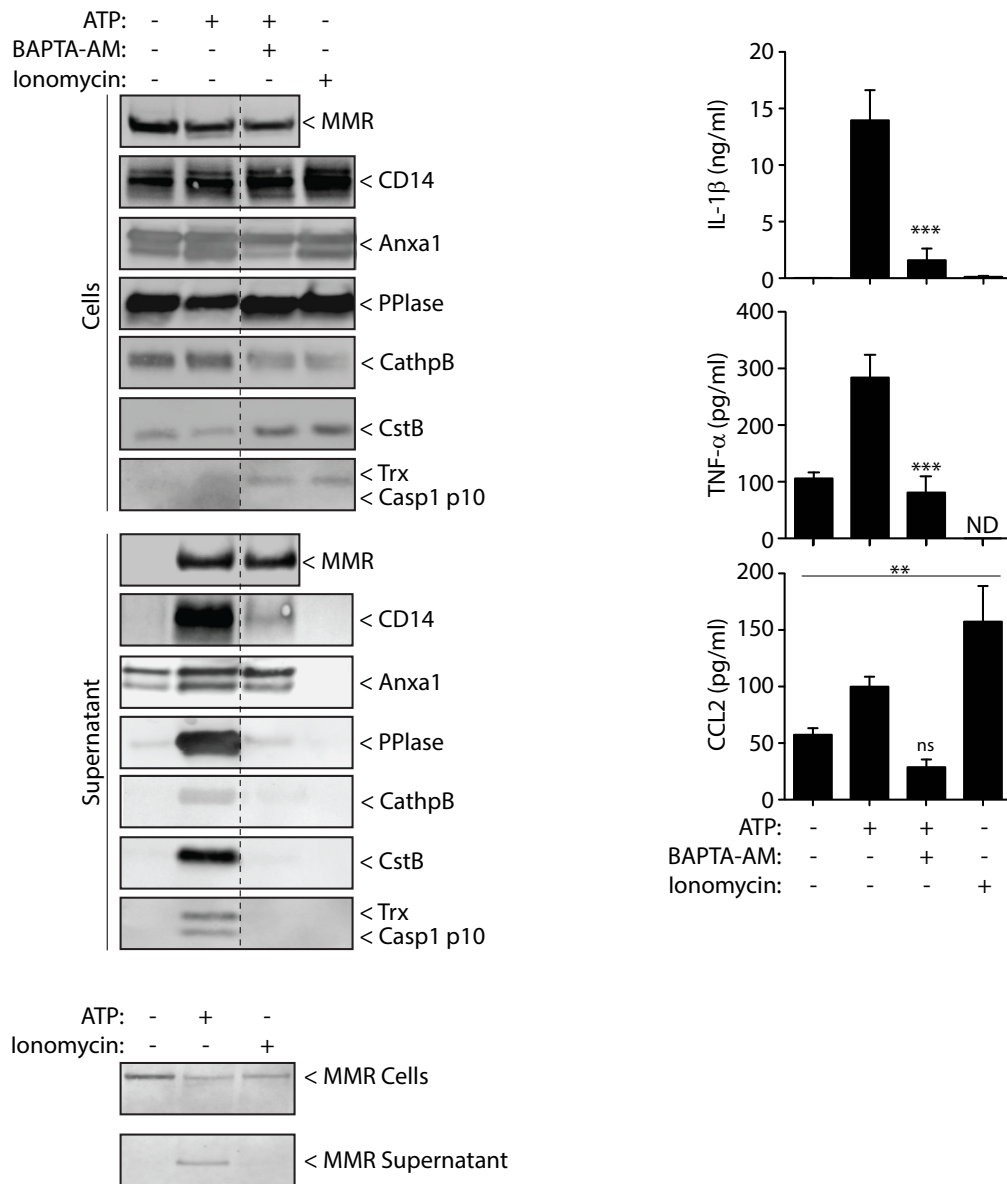

**Supplementary Figure S5. Intracellular calcium increase controls part of P2X7R secretome.**

Western blots used for quantification and ELISAs of selected P2X7R secretome proteins in cell lysates and cell-free supernatants shown in Figure 6A,B. Mouse bone marrow-derived macrophages (BMDMs) primed for 4 h with LPS (10 ng/ml for CCL2 and TNF- $\alpha$  or 1  $\mu$ g/ml for the other), followed by no stimulation (-) or stimulation (+) for 20 min with ATP (3 mM) or Ionomycin (5  $\mu$ M); when indicated BMDMs were treated 10 min before and during ATP stimulation with the cell permeable Ca<sup>2+</sup>-chelator BAPTA-AM (100  $\mu$ M). Western blots are representative of  $n = 2$  independent experiments and ELISA data is presented as mean and s.e.m. of  $n = 3$  independent experiments; ND, not detected. \*\*\* $p < 0.001$ ; \*\* $p < 0.01$ ; ns,  $p > 0.05$  (Student's  $t$ -test).

Supplementary Figure S6

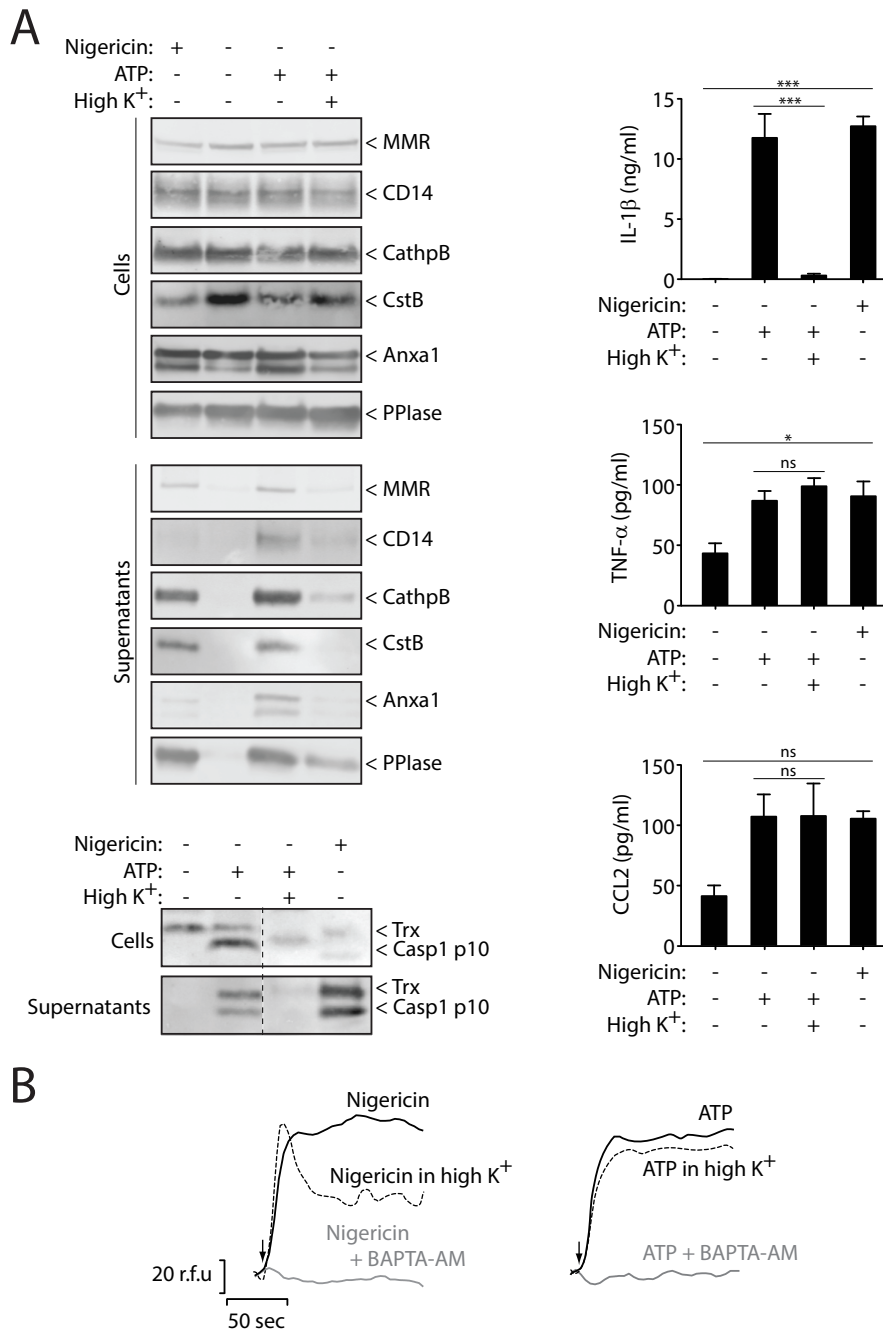

**Supplementary Figure S6. Caspase-1 dependent P2X7R secretome.**

A Western blots used for quantification and ELISAs of selected P2X7R secretome proteins in cell lysates and cell-free supernatants shown in Figure 7A,B. Mouse bone marrow-derived macrophages (BMDMs) primed for 4 h with LPS (10 ng/ml for CCL2 and TNF- $\alpha$  or 1  $\mu$ g/ml for the other), followed by no stimulation (-) or stimulation (+) for 20 min with ATP (3 mM) or nigericin (5  $\mu$ M); when indicated BMDMs were treated with ATP in a buffer with high concentration of K<sup>+</sup> (145 mM). Western blots are representative of  $n = 2$  independent experiments and ELISA data is presented as mean and s.e.m. of  $n = 3$  independent experiments; \*\*\* $p < 0.001$ ; \* $p < 0.05$ ; ns,  $p > 0.05$  (Student's  $t$ -test).

B Average trace of 6 independent wells for intracellular calcium rise in BMDMs primed as in A in the presence of absence of the Ca<sup>2+</sup>-chelator BAPTA-AM (100  $\mu$ M).

## Supplementary Figure S7

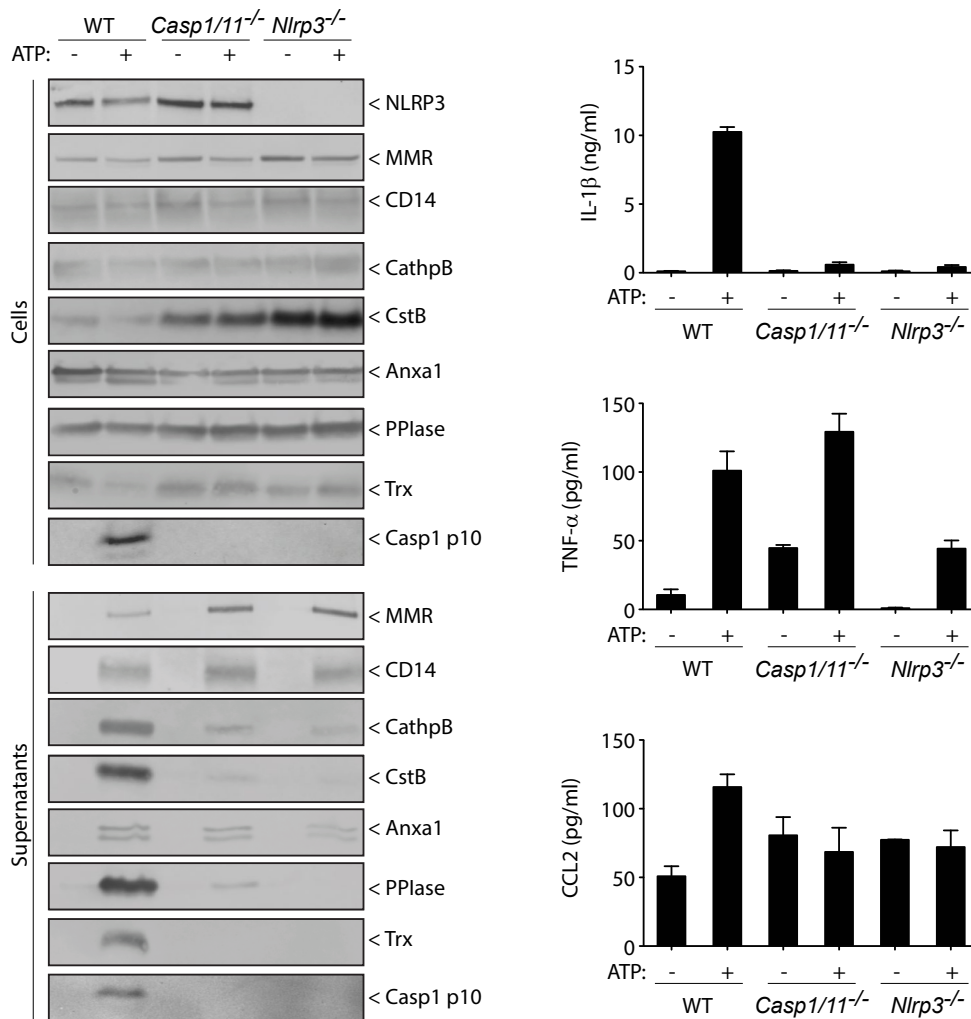

### Supplementary Figure S7. Inflammasome and caspase-1 dependent P2X7R secretome.

Western blots used for quantification and ELISAs of selected P2X7R secretome proteins in cell lysates and cell-free supernatants shown in Figure 7C. Mouse bone marrow-derived macrophages (BMDMs) from wild type (WT), *Casp1/11*<sup>-/-</sup> or *Nlrp3*<sup>-/-</sup> primed for 4 h with LPS (10 ng/ml for CCL2 and TNF- $\alpha$  or 1  $\mu$ g/ml for the other), followed by no stimulation (-) or stimulation (+) for 20 min with ATP (3 mM). Western blots are representative of  $n = 2-3$  independent experiments and ELISA data is presented as mean and s.e.m. of  $n = 3$  independent experiments.

## Supplementary Figure S8

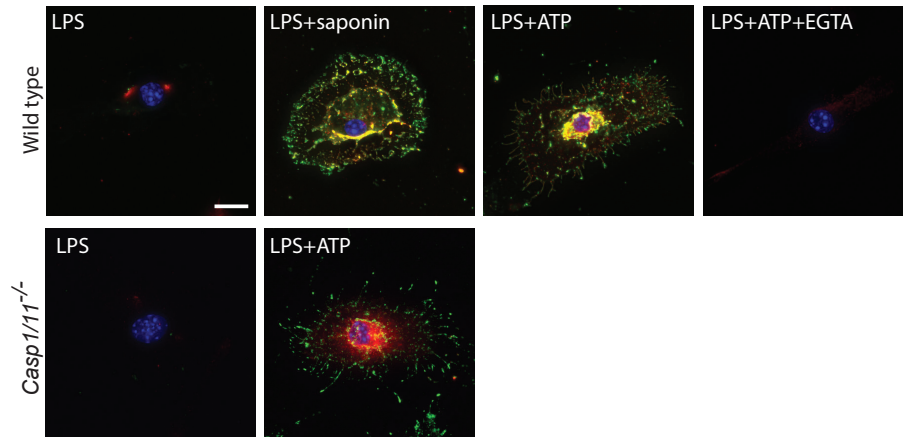

### Supplementary Figure S8. P2X7R control the release of metalloprotease.

Representative high intensity projection deconvolved images of mouse bone marrow- derived macrophages (BMDMs) from wild type or *Casp1/11*<sup>-/-</sup> as indicated primed for 4 h with LPS (1  $\mu\text{g/ml}$ ), followed by stimulation or not for 5 min with ATP (3 mM) and stained for phosphatidylserine with annexin V-FITC (green) and for Anxa1 (red) without cell permeabilization and then for nuclei (DAPI, blue); when indicated cells were permeabilised with saponin after fixation (0.01 %), or treated with the  $\text{Ca}^{2+}$ -chelator EGTA to impair binding of annexins to phosphatidylserine; scale bar = 10  $\mu\text{m}$ .

Supplemental Table S1 .Proteins identified by LC-MS/MS in M1 macrophages

| Accession number<br>( <i>Mus musculus</i> ) | Protein name                                         | Short name   | P2rx7 <sup>-</sup> | P2rx7 <sup>**</sup> | P2rx7 <sup>*</sup> | P2rx7 <sup>***</sup> | Signal peptide | Subcellular Localization <sup>1</sup> | Function <sup>1</sup>           | Exosomes <sup>1</sup> | Extracellular vesicle <sup>2</sup> | Phagosome <sup>3</sup> | Score   | Unique peptides | Sequence coverage | MW (KDa) |
|---------------------------------------------|------------------------------------------------------|--------------|--------------------|---------------------|--------------------|----------------------|----------------|---------------------------------------|---------------------------------|-----------------------|------------------------------------|------------------------|---------|-----------------|-------------------|----------|
| Q9WVA4                                      | Transgelin-2                                         | Tagln2       | 0                  | 1                   |                    | ***                  | -              | EVp                                   | Protein binding                 | +                     | +                                  |                        | 323,13  | 7               | 37,19%            | 22,2     |
| Q51630                                      | Macrophage mannose receptor 1                        | MMR          | 0                  | 1                   |                    | ***                  | +              | Cell membrane, endosome               | Receptor                        | +                     | +                                  |                        | 359,27  | 15              | 12,98%            | 165      |
| Q9CQI6                                      | Coactosin-like protein                               | Cotl1        | 0                  | 1                   |                    | ***                  | -              | CP, nucleus membrane, EVp             | Protein binding                 | +                     | +                                  |                        | 81,33   | 3               | 34,51%            | 15,9     |
| P05213                                      | Tubulin alpha-1B chain                               | Tuba1b       | 0                  | 1                   |                    | **                   | -              | CP                                    | Cytoskeletal organization       |                       |                                    |                        | 185,48  | 5               | 18,18%            | 50,1     |
| Q62426                                      | Cystatin-B                                           | Cstb         | 0                  | 1                   |                    | **                   | -              | CP, EVp                               | Protease inhibitor              | +                     | +                                  |                        | 10,63   | 2               | 33,67%            | 11       |
| P10639                                      | Thioredoxin                                          | Trx          | 0                  | 1                   |                    | **                   | -              | CP, mt, nucleus, EVp                  | Redox regulation                | +                     | +                                  |                        | 65,47   | 2               | 22,86%            | 11,7     |
| Q9QUH0                                      | Glutaredoxin-1                                       | Glrx         | 0                  | 1                   |                    | **                   | -              | CP, mt, nucleus, EVp                  | Redox regulation                | +                     | +                                  |                        | 23,93   | 2               | 19,63%            | 11,9     |
| P10810                                      | Monocyte differentiation antigen CD14                | CD14         | 0                  | 1                   |                    | **                   | +              | Cell membrane, GPI-anchor             | LPS binding                     |                       |                                    |                        | 92,65   | 5               | 21,04%            | 39,2     |
| P10126                                      | Elongation factor 1-alpha 1                          | EF-1-alpha-1 | 0                  | 1                   |                    | **                   | -              | CP, nucleus, EVp                      | Translational elongation factor | +                     |                                    | +                      | 111,22  | 6               | 35,50%            | 50,1     |
| P62827                                      | GTP-binding nuclear protein Ran                      | Ran          | 0                  | 1                   |                    | **                   | -              | CP, nucleus, EVp                      | Protein binding                 | +                     |                                    |                        | 16,7    | 2               | 31,94%            | 24,4     |
| Q91VW3                                      | SH3 domain-binding glutamic acid-rich-like protein 3 | Sh3bgrl3     | 0                  | 1                   |                    | **                   | -              | CP, nucleus, EVp                      | Redox regulation                | +                     |                                    |                        | 15,47   | 2               | 20,43%            | 10,5     |
| P63158                                      | High Mobility group protein B1                       | Hmgb1        | 0                  | 1                   |                    | *                    | -              | CP, nucleus,                          | DNA and Protein binding         |                       |                                    |                        | 13,93   | 2               | 12,56%            | 24,9     |
| Q9DBJ1                                      | Phosphoglycerate mutase 1                            | Pgam1        | 0                  | 1                   |                    | ***                  | -              | CP, EVp                               | Enzymatic activity              | +                     |                                    | +                      | 112,28  | 6               | 29,53%            | 28,8     |
| P17182                                      | Alpha-enolase                                        | Eno1         | 1                  | 1                   | *                  | ***                  | -              | CP, EVp                               | Enzymatic activity              | +                     | +                                  |                        | 1438,85 | 18              | 59,45%            | 47,1     |
| P10605                                      | Cathepsin B                                          | CathpB       | 1                  | 1                   | *                  | ***                  | +              | Lysosome, mt, EVp                     | Protease                        | +                     |                                    | +                      | 546,24  | 6               | 23,30%            | 37,3     |
| P35700                                      | Peroxioredoxin-1                                     | Prdx1        | 1                  | 1                   | *                  | ***                  | -              | CP, mt, EVp                           | Redox regulation                | +                     | +                                  |                        | 193,08  | 4               | 23,62%            | 22,2     |
| P16858                                      | Glyceraldehyde-3-phosphate dehydrogenase             | GAPDH        | 1                  | 1                   | *                  | ***                  | -              | CP, nucleus, EVp                      | Enzymatic activity              | +                     | +                                  | +                      | 435,12  | 6               | 25,83%            | 35,8     |
| P16110                                      | Galectin-3                                           | Gal-3        | 1                  | 1                   | *                  | ***                  | -              | CP, nucleus, EVp                      | Lectin activity                 | +                     |                                    |                        | 503,04  | 5               | 24,24%            | 27,5     |
| P63101                                      | 14-3-3 protein zeta/delta                            | Ywhaz        | 1                  | 1                   | *                  | ***                  | -              | CP, mt, nucleus, EVp                  | Protein binding                 | +                     | +                                  | +                      | 103,04  | 4               | 17,55%            | 27,8     |
| Q99PT1                                      | Rho GDP-dissociation inhibitor 1                     | Rho GDI 1    | 1                  | 1                   | *                  | ***                  | -              | CP, EVp                               | Protein binding                 | +                     |                                    |                        | 371,18  | 5               | 30,39%            | 23,4     |
| P99024                                      | Tubulin beta-5 chain                                 | Tubb5        | 1                  | 1                   | *                  | ***                  | -              | CP, nucleus, EVp                      | Cytoskeletal organization       | +                     | +                                  | +                      | 119,83  | 9               | 30,63%            | 49,6     |
| P18760                                      | Cofilin-1                                            | Cfl1         | 1                  | 1                   | *                  | ***                  | -              | CP, EVp                               | Cytoskeletal organization       | +                     |                                    |                        | 645,57  | 7               | 49,40%            | 18,5     |
| P16045                                      | Galectin-1                                           | Gal-1        | 1                  | 1                   | *                  | ***                  | -              | CP, EC, EVp                           | Apoptosis, differentiation      | +                     | +                                  |                        | 398,5   | 3               | 28,89%            | 14,9     |
| Q9DCD0                                      | 6-phosphogluconate dehydrogenase, decarboxylating    | Pgd          | 1                  | 1                   | *                  | ***                  | -              | CP, nucleus, EVp                      | Enzymatic activity              | +                     | +                                  |                        | 370,73  | 12              | 29,40%            | 53,2     |
| P17751                                      | Triosephosphate isomerase                            | TIM          | 1                  | 1                   | *                  | ***                  | -              | CP, EC, nucleus, EVp                  | Enzymatic activity              | +                     | +                                  |                        | 363,58  | 7               | 33,33%            | 26,7     |
| P09411                                      | Phosphoglycerate kinase 1                            | Pgk1         | 1                  | 1                   | *                  | ***                  | -              | CP, EVp                               | Enzymatic activity              | +                     | +                                  |                        | 438,75  | 11              | 46,28%            | 44,5     |
| P60710                                      | Actin, cytoplasmic 1                                 | Actb         | 1                  | 1                   | *                  | ***                  | -              | CP, EVp                               | Cytoskeletal organization       | +                     |                                    | +                      | 183,6   | 4               | 20,00%            | 41,7     |
| Q9Z1Q5                                      | Chloride intracellular channel protein 1             | NCC27        | 1                  | 1                   | *                  | **                   | -              | CP, EC, mt, nucleus, EVp              | Chloride ion channel            | +                     | +                                  |                        | 140,84  | 5               | 39,83%            | 27       |
| Q9JII6                                      | Alcohol dehydrogenase [NADP(+)]                      | Akr1a1       | 1                  | 1                   | *                  | **                   | -              | CP, EC, EVp                           | Enzymatic activity              | +                     |                                    |                        | 179,36  | 4               | 21,85%            | 36,6     |
| P52480                                      | Pyruvate kinase isozymes PKM                         | Pkm          | 1                  | 1                   | *                  | **                   | -              | Nucleus, mt, EVp                      | Enzymatic activity              | +                     | +                                  |                        | 197,2   | 7               | 24,29%            | 57,8     |
| P08905                                      | Lysozyme C-2                                         | Lyz2         | 1                  | 1                   | **                 | ***                  | +              | EC                                    | Lysozyme activity               |                       |                                    | +                      | 472,26  | 2               | 14,19%            | 16,7     |
| Q5SX49                                      | Profilin                                             | Pfn1         | 1                  | 1                   | **                 | ***                  | -              | CP, nucleus, EVp                      | Cytoskeletal organization       | +                     | +                                  |                        | 420,15  | 3               | 35,71%            | 11,8     |
| P17742                                      | Peptidyl-prolyl cis-trans isomerase A                | Pplase A     | 1                  | 1                   | **                 | ***                  | -              | CP, EC, nucleus, EVp                  | Protein folding activity        | +                     | +                                  |                        | 597,96  | 8               | 63,41%            | 18       |

CP, cytoplasm; EC, extracellular; mt, mitochondria; EVp, extracellular vesicular particle

\*\*\* In three experiments

\*\* In two experiments

\* In one experiments

Selection criteria. Identification in at least two experiments of 6 (3 P2rx7<sup>\*\*</sup> and 3 P2rx7<sup>\*</sup>)<sup>1</sup> UniProtKb database. Reorganizing the protein space at the Universal Protein Resource (UniProt). Nucleic Acids Res. 40: D71-D75 (2012).<sup>2</sup> Quantitative Proteomics of Extracellular Vesicles Released from Human Monocyte-Derived Macrophages upon  $\beta$ -Glucan Stimulation. Cypriak W, Ohman T, Eskelinen EL, Matikainen S, Nyman TA. J Proteome Res. 2014;13(5):2468-77.<sup>3</sup> The phagosome proteome: insight into phagosome functions. Garin J, Diez R, Kieffer S, Dermine JF, Duclos S, Gagnon E, Sadou R, Rondeau C, Desjardins M. J Cell Biol. 2001;152(1):165-80.



Supplemental Table S2 .Proteins identified by LC-MS/MS in M2 macrophages

| Accession number<br>( <i>Mus musculus</i> ) | Protein name                             | Short name | P2rx7 <sup>+</sup> | P2rx7 <sup>+</sup> | P2rx7 <sup>-</sup> | P2rx7 <sup>+/+</sup> | Signal peptide | Subcellular Localization <sup>1</sup> | Function <sup>1</sup>                                    | Exosomes <sup>1</sup> | Extracellular vesicle <sup>2</sup> | Phagosome <sup>3</sup> | Score  | Unique peptides | Sequence coverage | MW (KDa) |
|---------------------------------------------|------------------------------------------|------------|--------------------|--------------------|--------------------|----------------------|----------------|---------------------------------------|----------------------------------------------------------|-----------------------|------------------------------------|------------------------|--------|-----------------|-------------------|----------|
| Q61830                                      | Macrophage mannose receptor 1            | MMR        | 0                  | 1                  |                    | ***                  | +              | Cell membrane, endosome               | Receptor                                                 | +                     | +                                  |                        | 320,51 | 10              | 10,16%            | 165      |
| P10107                                      | Annexin A1                               | Anxa1      | 0                  | 1                  |                    | **                   | -              | CP, mt, nucleous, EVp                 | Ca-dependent phospholipid binding, involve in exocytosis | +                     | +                                  |                        | 95,06  | 5               | 17,34%            | 38,7     |
| P07356                                      | Annexin A2                               | Anxa2      | 0                  | 1                  |                    | **                   | -              | CP, cell membrane, EVp                | Ca-dependent phospholipid binding, involve in exocytosis | +                     | +                                  |                        | 74,27  | 3               | 13,86%            | 38,7     |
| P97429                                      | Annexin A4                               | Anxa4      | 0                  | 1                  |                    | **                   | -              | CP, EVp                               | Ca-dependent phospholipid binding, involve in exocytosis | +                     | +                                  |                        | 72,44  | 3               | 15,05%            | 36       |
| P10810                                      | Monocyte differentiation antigen CD14    | CD14       | 0                  | 1                  |                    | **                   | +              | Cell membrane,GPI-anchor              | LPS binding                                              |                       |                                    |                        | 15,35  | 3               | 13,39%            | 39,2     |
| P08905                                      | Lysozyme C-2                             | Lyz2       | 0                  | 1                  |                    | **                   | +              | EC                                    | Lysozyme activity                                        | +                     |                                    | +                      | 553,18 | 2               | 14,19%            | 16,7     |
| P17742                                      | Peptidyl-prolyl cis-trans isomerase A    | Pplase A   | 0                  | 1                  |                    | **                   | -              | CP, EC, nucleous, EVp                 | Protein folding activity                                 | +                     |                                    |                        | 189,73 | 3               | 22,56%            | 17,9     |
| P63101                                      | 14-3-3 protein zeta/delta                | Ywhaz      | 1                  | 1                  | *                  | **                   | -              | CP, mt, nucleous, EVp                 | Protein binding                                          | +                     | +                                  | +                      | 84,41  | 3               | 17,96%            | 27,8     |
| P16110                                      | Galectin-3                               | Gal-3      | 1                  | 1                  | *                  | **                   | -              | CP, nucleous, EVp                     | Lectin activity                                          | +                     |                                    | +                      | 96,13  | 4               | 18,56%            | 27,5     |
| P52480                                      | Pyruvate kinase isozymes PKM             | Pkm        | 1                  | 1                  | *                  | **                   | -              | Nucleous, mt, EVp                     | Enzymatic activity                                       | +                     | +                                  |                        | 30,91  | 3               | 6,97%             | 39,2     |
| P18760                                      | Cofilin-1                                | Cfl1       | 1                  | 1                  | *                  | **                   | -              | CP, EVp                               | Cytoskeletal organization                                | +                     | +                                  |                        | 102,25 | 3               | 31,93%            | 18,5     |
| Q9JH6                                       | Alcohol dehydrogenase [NADP(+)]          | Akr1a1     | 1                  | 1                  | *                  | *                    | -              | CP, EC, EVp                           | Enzymatic activity                                       | +                     |                                    |                        | 11,73  | 2               | 10,46%            | 36,6     |
| P62962                                      | Profilin                                 | Pfn1       | 1                  | 1                  | *                  | *                    | -              | CP, nucleous, EVp                     | Cytoskeletal organization                                | +                     | +                                  |                        | 44,34  | 2               | 23,21%            | 11,8     |
| Q99PT1                                      | Rho GDP-dissociation inhibitor 1         | Rho GDI 1  | 1                  | 1                  | *                  | *                    | -              | CP, EVp                               | Protein binding                                          | +                     |                                    | +                      | 133,61 | 2               | 15,69%            | 23,4     |
| Q9DBJ1                                      | Phosphoglycerate mutase 1                | PGAM-B     | 1                  | 1                  | *                  | *                    | -              | CP, EVp                               | Enzymatic activity                                       | +                     |                                    | +                      | 11,02  | 3               | 19,69%            | 28,8     |
| Q9Z1Q5                                      | Chloride intracellular channel protein 1 | NCC27      | 1                  | 1                  | *                  | *                    | -              | CP, EC, mt, nucleous, EVp             | Chloride ion channel                                     | +                     | +                                  |                        | 79,33  | 2               | 12,45%            | 27,1     |
| P17182                                      | Alpha-enolase                            | Eno1       | 1                  | 1                  | **                 | ***                  | -              | CP, EVp                               | Enzymatic activity                                       | +                     |                                    | +                      | 140,14 | 8               | 24,88%            | 47,1     |
| P16858                                      | Glyceraldehyde-3-phosphate dehydrogenase | GAPDH      | 1                  | 1                  | **                 | ***                  | -              | CP, nucleous, EVp                     | Enzymatic activity                                       | +                     | +                                  | +                      | 110,18 | 3               | 13,51%            | 35,8     |
| P60710                                      | Actin, cytoplasmic 1                     | Actb       | 1                  | 1                  | **                 | ***                  | -              | CP, EVp                               | Cytoskeletal organization                                | +                     | +                                  | +                      | 83,27  | 2               | 9,07%             | 41,7     |
| P10605                                      | Cathepsin B                              | CathpB     | 1                  | 1                  | **                 | *                    | +              | Lysosome, mt, EVp                     | Protease                                                 | +                     | +                                  | +                      | 70,12  | 2               | 8,85%             | 37,3     |
| P35700                                      | Peroxisome oxidin-1                      | Prdx1      | 1                  | 1                  | **                 | ***                  | -              | CP, mt, EVp                           | Redox regulation                                         | +                     | +                                  |                        | 333,95 | 7               | 45,53%            | 18,9     |

CP, cytoplasm; EC, extracellular; mt, mitochondria;  
 EVp, extracellular vesicular particle  
 \*\*\* In three experiments  
 \*\* In two experiments  
 \* In one experiments

Selection criteria. Identification in at least two experiments of 6 (3 P2rx7<sup>+/+</sup> and 3 P2rx7<sup>-</sup>)

<sup>1</sup>UniProtKb database. Reorganizing the protein space at the Universal Protein Resource (UniProt). Nucleic Acids Res. 40: D71-D75 (2012).

<sup>2</sup>Quantitative Proteomics of Extracellular Vesicles Released from Human Monocyte-Derived Macrophages upon  $\beta$ -Glucan Stimulation. Cypryk W, Ohman T, Eskelinen EL, Matikainen S, Nyman TA. J Proteome Res. 2014;13(5):2468-77.

<sup>3</sup>The phagosome proteome: insight into phagosome functions. Garin J, Diez R, Kieffer S, Dermine JF, Duclos S, Gagnon E, Sadou R, Rondeau C, Desjardins M. J Cell Biol. 2001;152(1):165-80.

Supplemental Table S3 .Proteins identified by antibodies array in M1 macrophages

| Accession number<br>( <i>Mus musculus</i> ) | Protein name                                                                            | Short name    | Fold change <i>P2rx7<sup>+/+</sup></i> /<br><i>P2rx7<sup>-/-</sup></i> | Signal peptide | Subcellular Localization  | Function                                                                     |
|---------------------------------------------|-----------------------------------------------------------------------------------------|---------------|------------------------------------------------------------------------|----------------|---------------------------|------------------------------------------------------------------------------|
| P10148                                      | C-C motif chemokine 2                                                                   | CCL2          | >100*                                                                  | +              | EC                        | Chemokine                                                                    |
| Q9Z0L2                                      | Artemin                                                                                 | Artn          | >100*                                                                  | +              | EC                        | Coreceptor activity                                                          |
| P18337                                      | L-selectin                                                                              | CD62L         | 24,25                                                                  | +              | Cell membrane             | Cell adhesion molecule                                                       |
| P10749                                      | Interleukin 1-beta                                                                      | IL-1 beta     | 9,71                                                                   |                | EC                        | Cytokine                                                                     |
| Q00993                                      | Tyrosine-protein kinase receptor UFO                                                    | Axl           | 9,36                                                                   | +              | Cell membrane             | Receptor Tyrosine kinase.<br>Function in innate immune<br>reponse inhibition |
| P11835                                      | Integrin beta-2                                                                         | CD18          | 5,57                                                                   | +              | Cell membrane             | Receptor activity                                                            |
| Q8K1S7                                      | Kremen protein 2                                                                        | Kremen2       | 5,21                                                                   | +              | Cell membrane             | Receptor activity. Block<br>Wnr/beta-catenin signalling                      |
| P05555                                      | Integrin alpha-M                                                                        | CD11b         | 3,3                                                                    | +              | Cell membrane             | Receptor activity                                                            |
| Q8K480                                      | Membrane frizzled-related protein                                                       | Mfrp          | 3,11                                                                   |                | Cell membrane             | Unknown                                                                      |
| P05366                                      | Serum Amyloid A-1 protein                                                               | Saa1          | 2,56                                                                   | +              | EC                        | Acute phase protein                                                          |
| P51670                                      | C-C motif chemokine 9                                                                   | CCL9          | 2,14                                                                   | +              | EC                        | Chemokine                                                                    |
| Q61271                                      | Activin receptor type-1B                                                                | ACTR-1B       | 2,89                                                                   | +              | Cell membrane             | Receptor Ser/Thr kinase                                                      |
| P17125                                      | Transforming growth factor beta-3                                                       | TGF-beta-3    | 2,63                                                                   | +              | EC                        | Growth factor                                                                |
| O70326                                      | Gremlin                                                                                 | Grem1         | 2,85                                                                   | +              | EC                        | Cytokine                                                                     |
| Q9JUT2                                      | GDNF family receptor alpha-4                                                            | GDNFR-alpha-4 | 2,69                                                                   | +              | EC, Cell membrane         | Coreceptor activity                                                          |
| Q9JKC0                                      | C-C motif chemokine 24                                                                  | CCL24         | 2,30                                                                   | +              | EC                        | Chemokine                                                                    |
| P55104                                      | Inhibin beta C chain                                                                    | Inhbc         | 2,08                                                                   | +              | EC                        | Growth factor                                                                |
| P09535                                      | Insulin-like growth factor II                                                           | Igf2          | 2,17                                                                   | +              | EC                        | Growth factor                                                                |
| Q62401                                      | C-C motif chemokine 12                                                                  | CCL12         | 1,72                                                                   | +              | EC                        | Chemokine                                                                    |
| Q03142                                      | Fibroblast growth factor receptor 4                                                     | FGFR-4        | 2,05                                                                   | +              | Cell membrane, endosome   | Tyrosine kinase receptor.                                                    |
| P34960                                      | Macrophage metalloelastase                                                              | MME           | 1,63                                                                   | +              | EC                        | Protease                                                                     |
| Q08048                                      | Hepatocyte growth factor                                                                | HGF           | 1,87                                                                   | +              | EC                        | Growth factor                                                                |
| Q9Z121                                      | C-C motif chemokine 8                                                                   | CCL8          | 1,71                                                                   | +              | EC                        | Chemokine                                                                    |
| P97463                                      | Neurturin                                                                               | Nrtn          | >100*#                                                                 | +              | EC                        | Growth factor                                                                |
| Q64280                                      | Left-right determination factor 1                                                       | Lefty1        | >100*#                                                                 | +              | EC                        | Growth factor                                                                |
| Q07104                                      | Growth/differentiation factor 3                                                         | GDF-3         | >100*#                                                                 | +              | EC                        | Growth factor                                                                |
| Q8K4C2                                      | Interleukin-17 receptor C                                                               | IL-17RC       | >100*#                                                                 | +              | Cell membrane             | IL-17 receptor                                                               |
| P10810                                      | Monocyte differentiation antigen CD14                                                   | CD14          | >100*#                                                                 | +              | Cell membrane, GPI-anchor | LPS binding                                                                  |
| O55233                                      | Cerberus                                                                                | Cer1          | >100*#                                                                 | +              | EC                        | Cytokine                                                                     |
| P05622                                      | Platelet-derived growth factor receptor beta                                            | PDGFR-beta    | >100*#                                                                 | +              | Cell membrane             | Receptor Tyrosine kinase.                                                    |
| P18340                                      | C-X-C motif chemokine 9                                                                 | CXCL9         | >100*#                                                                 | +              | EC                        | Chemokine                                                                    |
| P51865                                      | Teratocarcinoma-derived growth factor Tumor necrosis factor ligand superfamily member 6 | TdGF1         | >100*#                                                                 | +              | Cell membrane, GPI-anchor | Growth factor                                                                |
| P41047                                      | Stromelysin-1                                                                           | SL-1          | >100*#                                                                 | +              | EC, cell membrane, EVp    | Cytokine                                                                     |
| P28862                                      | Stromal cell-derived factor 1                                                           | SDF-1         | >100*#                                                                 | +              | EC                        | Protease                                                                     |
| P40224                                      | Leptin receptor                                                                         | LEP-R         | >100*#                                                                 | +              | EC                        | Chemokine                                                                    |
| P48356                                      | Leptin receptor                                                                         | LEP-R         | >100*#                                                                 | +              | Cell membrane             | Receptor activity                                                            |
| P49764                                      | Placenta growth factor                                                                  | PIGF          | >100*#                                                                 | +              | EC                        | Growth factor                                                                |
| P15247                                      | Interleukin-9                                                                           | IL-9          | >100*#                                                                 | +              | EC                        | Cytokine                                                                     |
| P11033                                      | Granzyme D                                                                              | Gzmd          | >100*#                                                                 | +              | Cytoplasmic granule       | Protease                                                                     |
| P26618                                      | Platelet-derived growth factor receptor alpha                                           | PDGFR-alpha   | >100*#                                                                 | +              | Cell membrane             | Receptor Tyrosine kinase.                                                    |
| P20109                                      | Interleukin-13                                                                          | IL-13         | >100*#                                                                 | +              | EC                        | Cytokine                                                                     |
| Q8K5B1                                      | Interleukin-31 receptor subunit alpha                                                   | IL-31RA       | >100*#                                                                 | +              | Cell membrane             | IL-31 receptor                                                               |
| O88472                                      | Tumor necrosis factor receptor superfamily member 17                                    | CD269         | >100*#                                                                 | +              | Cell membrane             | Receptor activity                                                            |
| Q60837                                      | Interleukin-12 receptor subunit beta 1                                                  | IL-12R-beta-1 | >100*#                                                                 | +              | Cell membrane             | IL-12 receptor                                                               |
| Q9JLZ8                                      | Single Ig IL-1 related receptor                                                         | Sigirr        | >100*#                                                                 | +              | Cell membrane             | Receptor activity                                                            |
| Q9JLL3                                      | Tumor necrosis factor receptor superfamily member 19                                    | Tnfrsf19      | >100*#                                                                 | +              | Cell membrane             | Receptor activity                                                            |
| Q9EQI5                                      | Thymus Chemokine-1                                                                      | CXCL7         | >100*#                                                                 | +              | EC                        | Chemokine                                                                    |
| P17515                                      | C-X-C motif chemokine 10                                                                | CXCL10        | >100*#                                                                 | +              | EC                        | Chemokine                                                                    |
| P20826                                      | Kit ligand                                                                              | Kitlg         | >100*#                                                                 | +              | EC, cell membrane         | Growth factor                                                                |
| Q924X1                                      | Epigen                                                                                  | Epgn          | >100*#                                                                 | +              | Cell membrane             | Growth factor                                                                |
| P48346                                      | Interleukin-15                                                                          | IL-15         | >100*#                                                                 | +              | EC                        | Cytokine                                                                     |
| Q61098                                      | Interleukin-18 receptor 1                                                               | IL-18R1       | >100*#                                                                 | +              | Cell membrane             | IL-18 receptor                                                               |
| P21956                                      | Lactadherin                                                                             | Mfge8         | >100*#                                                                 | +              | EC, cell membrane, EVp    | Contributes to phagocytic<br>removal apoptotic cells                         |
| Q9JJY9                                      | Interleukin-22                                                                          | IL-22         | >100*#                                                                 | +              | EC                        | Cytokine                                                                     |
| Q62226                                      | Sonic hedgehog protein                                                                  | SHH           | >100*#                                                                 | +              | EC, cell membrane         | Protease                                                                     |
| Q02858                                      | Angiopoietin-1 receptor                                                                 | CD202b        | >100*#                                                                 | +              | Cell membrane             | Receptor Tyrosine kinase.                                                    |
| Q9QUK6                                      | Toll-like receptor 4                                                                    | CD284         | >100*#                                                                 | +              | Cell membrane             | Receptor activity                                                            |
| Q9EQC7                                      | Follistatin-related protein 3                                                           | Fstl3         | >100*#                                                                 | +              | EC                        | Activin binding                                                              |
| Q61826                                      | Mucosal addressin cell adhesion molecule 1                                              | MAdCAM-1      | >100*#                                                                 | +              | Cell membrane             | Cell adhesion molecule                                                       |
| P47993                                      | Lymphotactin                                                                            | Xcl1          | >100*#                                                                 | +              | EC                        | Chemokine                                                                    |
| Q9JJN1                                      | Fibroblast growth factor 21                                                             | FGF-21        | >100*#                                                                 | +              | EC                        | Growth factor                                                                |
| Q6PHB0                                      | Interleukin-20 receptor subunit alpha                                                   | IL-20RA       | >100*#                                                                 | +              | Cell membrane             | IL-20 receptor                                                               |
| P13366                                      | Granzyme G                                                                              |               | >100*#                                                                 | +              | Cytoplasmic granule       | Protease                                                                     |
| Q61851                                      | Fibroblast growth factor receptor 3                                                     | FGFR-3        | >100*#                                                                 | +              | Cell membrane             | Receptor Tyrosine kinase.                                                    |
| Q9ER04                                      | Transmembrane protease serine 5                                                         | Tmpss5        | >100*#                                                                 | +              | EC, cell membrane         | Protease                                                                     |
| Q5UBV8                                      | Tumor necrosis factor ligand superfamily member 15                                      | Tnfsf15       | >100*#                                                                 | +              | EC, cell membrane         | Cytokine                                                                     |
| Q62151                                      | Advance glycosylation end product-specific receptor                                     | RAGE          | >100*#                                                                 | +              | Cell membrane             | Receptor activity                                                            |
| Q8CI19                                      | Platelet-derived growth factor C                                                        | PDGF-C        | >100*#                                                                 | +              | EC                        | Growth factor                                                                |
| O88786                                      | Interleukin-13 receptor subunit alpha 2                                                 | IL-13RA2      | >100*#                                                                 | +              | EC, cell membrane         | Receptor activity                                                            |
| Q64729                                      | TGF-beta receptor type-1                                                                | TGFR-1        | >100*#                                                                 | +              | Cell membrane             | Receptor Ser/Thr kinase                                                      |
| Q9Z0W1                                      | Tumor necrosis factor receptor superfamily member 16                                    | CD271         | >100*#                                                                 | +              | Cell membrane             | Receptor activity                                                            |
| Q61160                                      | FAS-associated death domain protein                                                     | Fadd          | >100*#                                                                 | +              | CP                        | Protein binding                                                              |
| P06804                                      | Tumor necrosis factor                                                                   | TNF-a         | >100*#                                                                 | +              | EC, cell membrane         | Cytokine                                                                     |
| Q9R1V4                                      | Disintegrin and metalloproteinase domain-containing protein 11                          | ADAM 11       | >100*#                                                                 | +              | EC, cell membrane         | Protease                                                                     |

\* No signal in *P2rx7<sup>-/-</sup>* samples

# Signal intensity lower of 5 % of positive

CP, cytoplasm; EC, extracellular; mt, mitochondria; EVp, extracellular vesicular particle
